# Supplementary material for: Electron transfer photochromism of solid-state supramolecules constructed by cucurbit[n]uril (n = 5–8) and 1-(4-carboxybenzyl)-4-[2-(4-pyridyl)-vinyl]-pyridinium chloride
Source: Royal Society of Chemistry journal article supplement (doi:10.1039/d1nj04292k), 2021-01-01

## Electronic Supplementary Information (ESI)

### Electron transfer photochromism of solid-state supramolecules constructed by cucurbit[n]uril (n = 5-8) and 1-(4-carboxybenzyl)-4-[2-(4-pyridyl)-vinyl]-pyridinium chloride

Qin Wang,<sup>a</sup> Mei-Chen Liu,<sup>a</sup> Wen-Qi Sun,<sup>a\*</sup> Rui-Lian Lin,<sup>a</sup> and Jing-Xin Liu<sup>a\*</sup>

College of Chemistry and Chemical Engineering, Anhui University of Technology, Maanshan 243002, China. E-mail: [jxliu411@ahut.edu.cn](mailto:jxliu411@ahut.edu.cn) (J.X. Liu); [wenqisun@sohu.com](mailto:wenqisun@sohu.com) (W.Q. Sun)

### Table of Contents

|                                                                                                     |     |
|-----------------------------------------------------------------------------------------------------|-----|
| Figure S1. 2D gCOSY NMR spectrum of 1 <sup>+</sup> with 1.10 equiv. of Q[5].....                    | S2  |
| Figure S2. 2D gCOSY NMR spectrum of 1 <sup>+</sup> with 1.10 equiv. of Q[6].....                    | S3  |
| Figure S3. 2D gCOSY NMR spectrum of 1 <sup>+</sup> with 1.12 equiv. of Q[8].....                    | S4  |
| Figure S4. <sup>1</sup> H NMR spectra of 1 <sup>+</sup> with Q[8] before and after irradiation..... | S5  |
| Figure S5. UV-Vis spectra of 1 <sub>2</sub> <sup>+</sup> @Q[8] before and after irradiation.....    | S6  |
| Figure S6. UV titration of 1 <sup>+</sup> with Q[n]s .....                                          | S7  |
| Table S1. Binding ratios and binding constants of 1 <sup>+</sup> ·Cl <sup>-</sup> with Q[n]s.....   | S8  |
| Figure S7. Photos showing the colour change can occur multiple times.....                           | S9  |
| Figure S8. IR spectra of 1 <sup>+</sup> @Q[7] before and after irradiation.....                     | S10 |
| Figure S9. IR spectra of 1 <sub>2</sub> <sup>+</sup> @Q[8] before and after irradiation.....        | S11 |
| Figure S10. Energy minimized structures of four complexes.....                                      | S12 |

**Figure S1.** 2D gCOSY NMR spectrum of **1**<sup>+</sup> with 1.10 equiv. of Q[5] at pD 2.0.

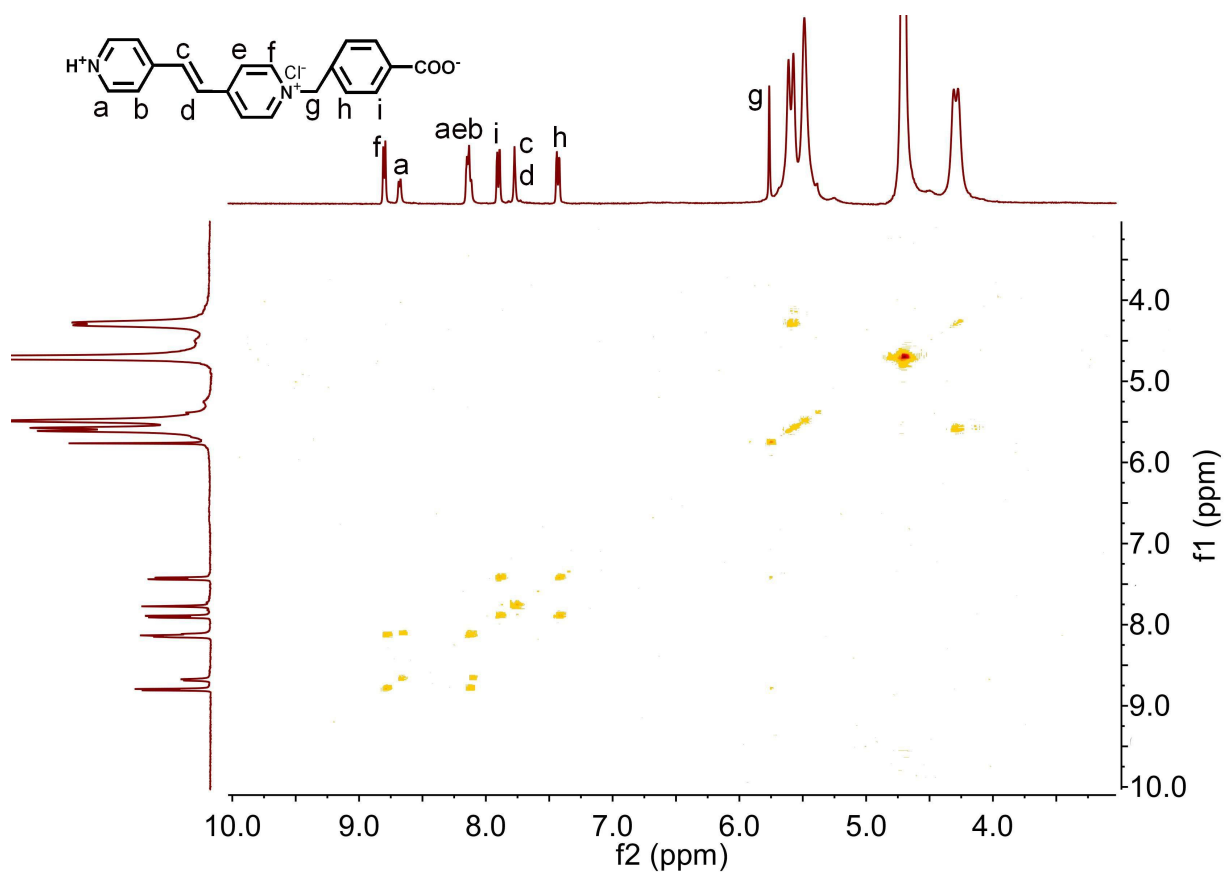

Figure S2. 2D gCOSY NMR spectrum of  $1^+$  with 1.10 equiv. of Q[6] at pD 2.0.

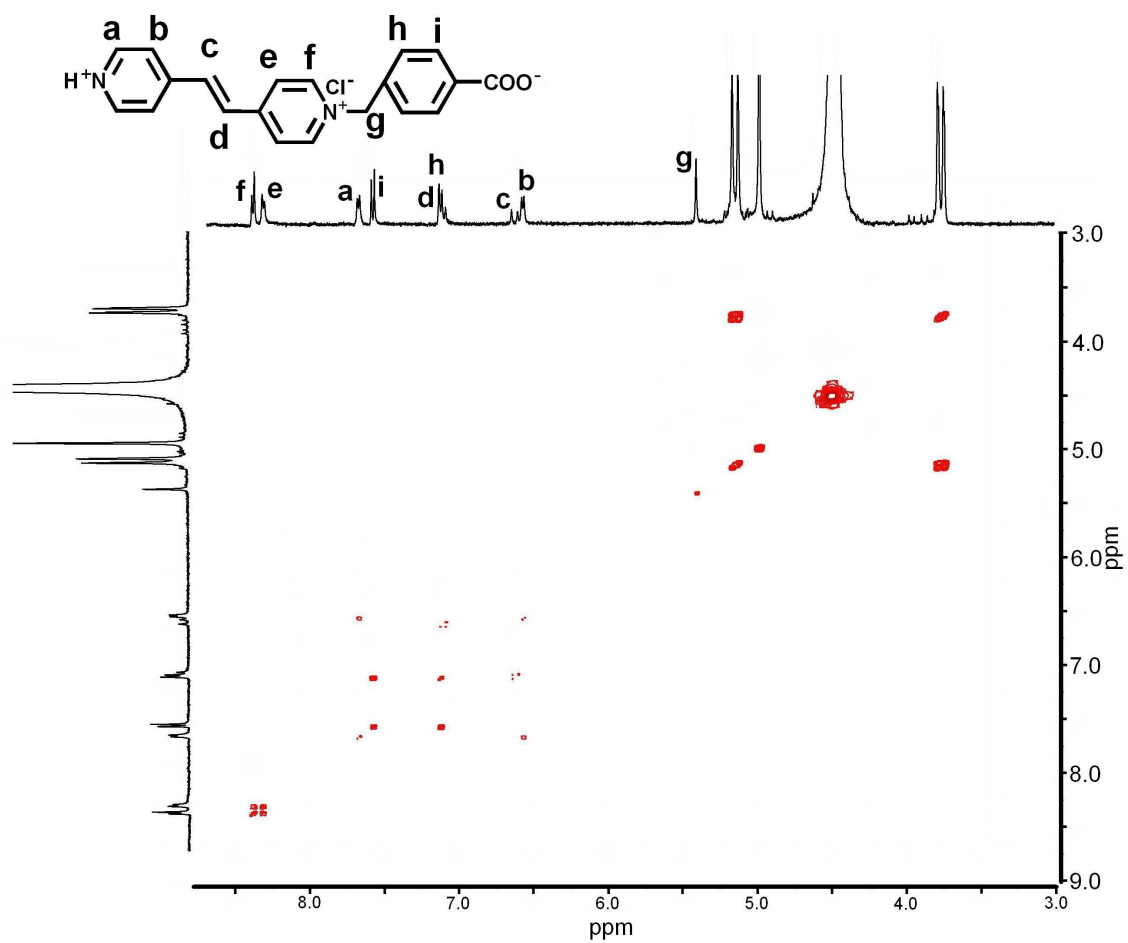

Figure S3. 2D gCOSY NMR spectrum of  $1^+$  with 1.12 equiv. of Q[8] at pD 2.0.

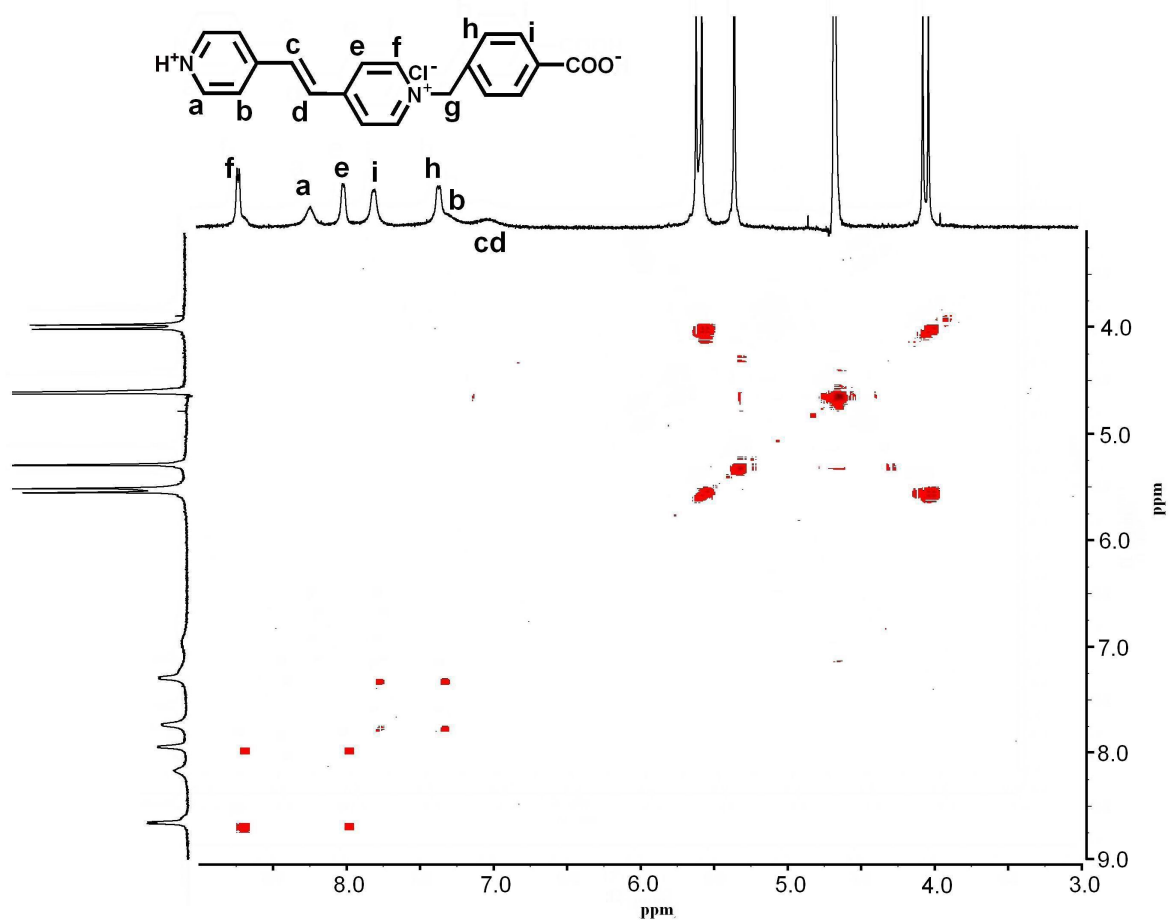

**Figure S4.**  $^1\text{H}$  NMR spectra of  $1^+$  (A) with 1.12 equiv of Q[8] before (B) and after (C) irradiation.

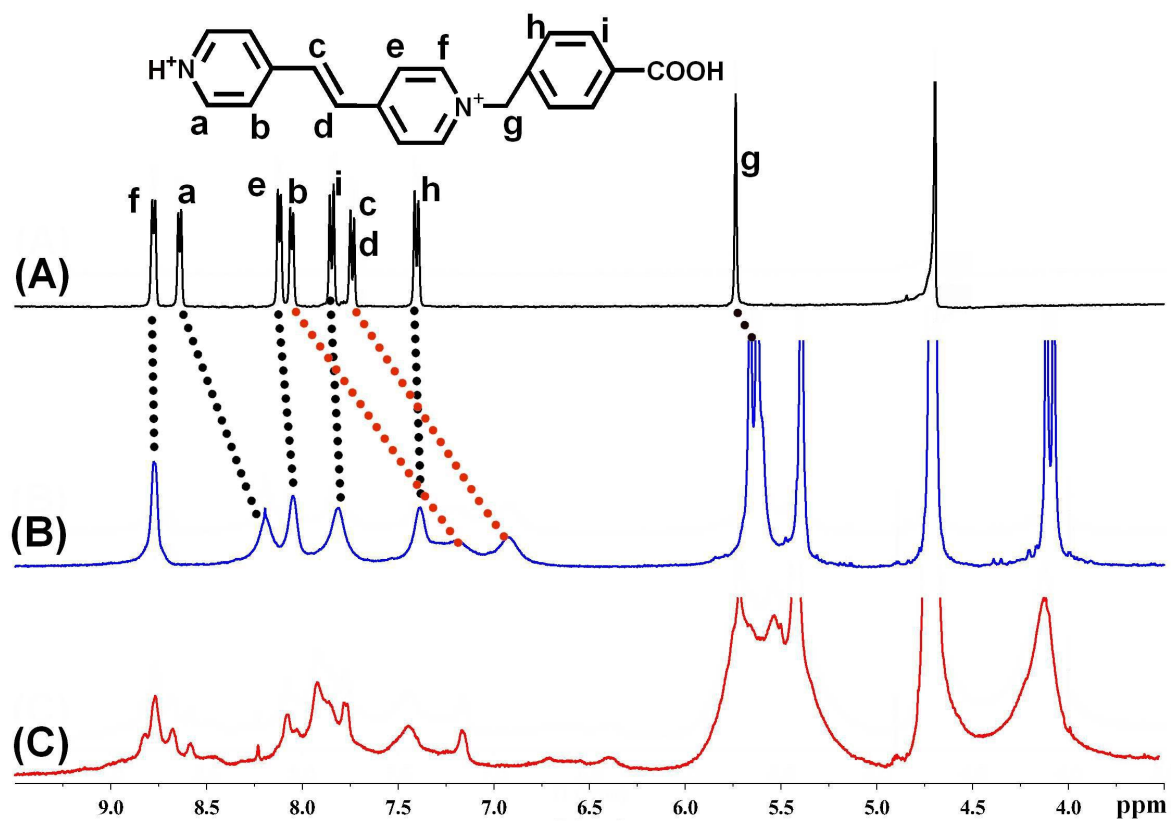

**Figure S5.** UV-Vis spectra of  $1^+_2@Q[8]$  before and after irradiation.

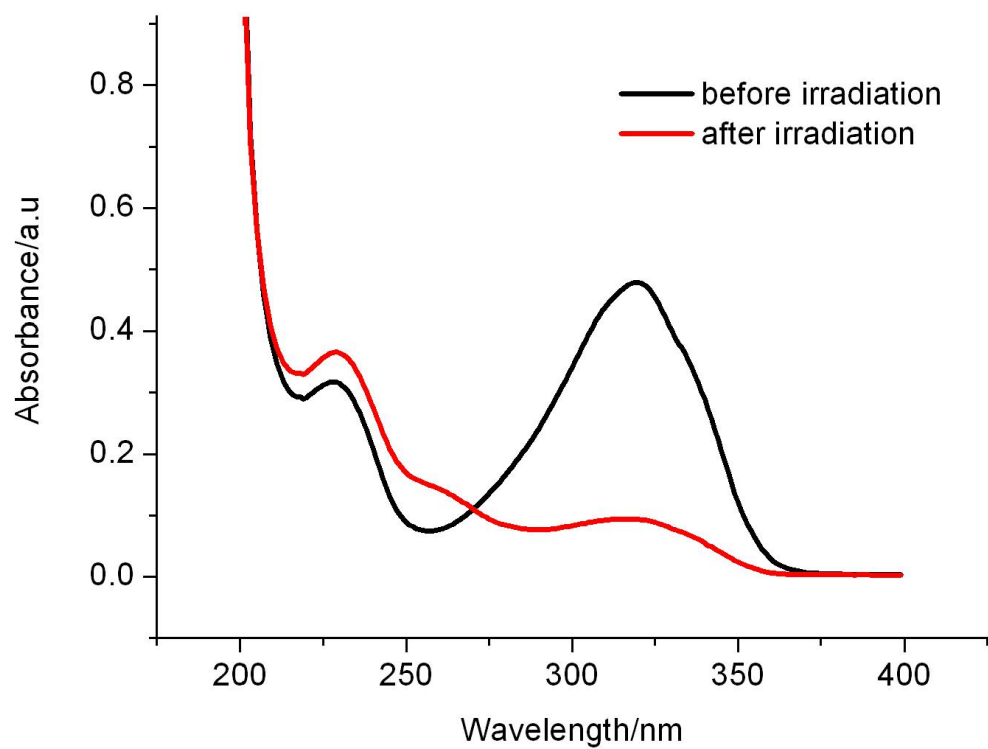

**Figure S6.** Left column, change in absorption spectra of guest **1** with increasing concentration of  $Q[n]$ . Right column, the curves of Absorbance vs.  $N_{Q[n]}/N_{\text{guest}}$ .

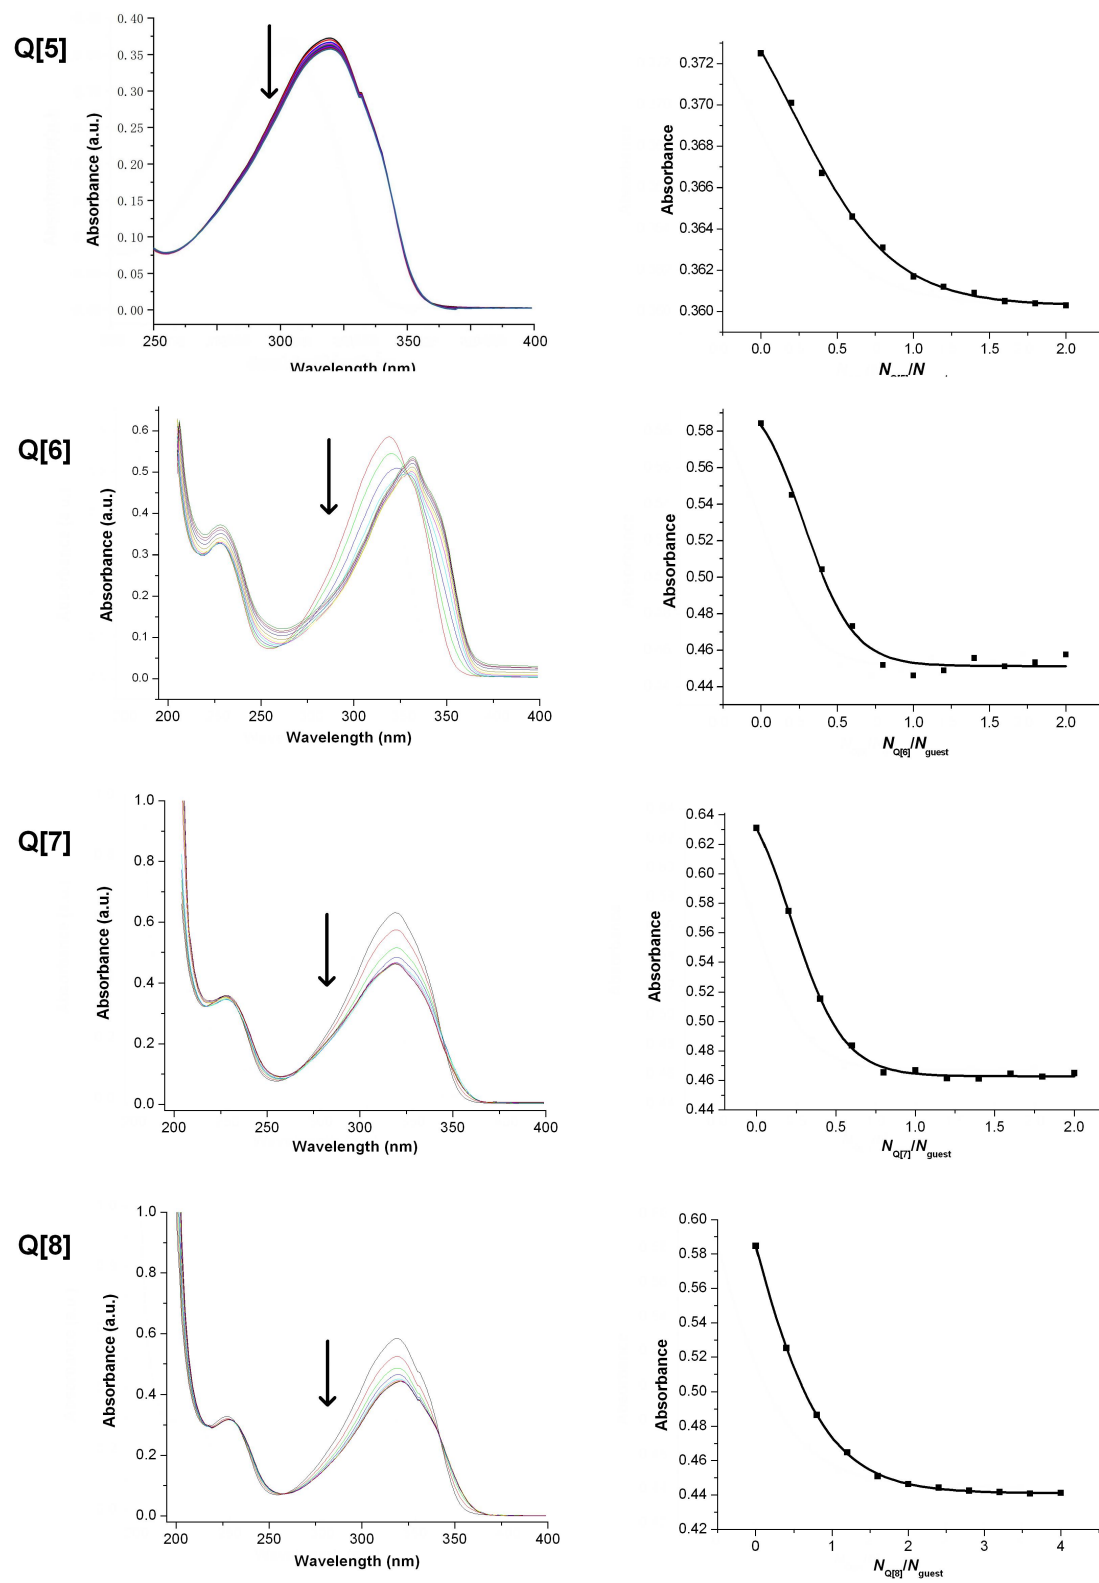

**Table S1.** Binding ratios and binding constants of  $\mathbf{1}^+\cdot\text{Cl}^-$  with Q[*n*]s.

| Host                                          | Q[5]                       | Q[6]                       | Q[7]                       | Q[8]                       |
|-----------------------------------------------|----------------------------|----------------------------|----------------------------|----------------------------|
| Binding ratios                                | 1:1                        | 1:1                        | 1:1                        | 1:2                        |
| Binding constants ( $K_a$ , $\text{M}^{-1}$ ) | $(3.65\pm 0.80)\cdot 10^3$ | $(1.80\pm 0.60)\cdot 10^4$ | $(2.91\pm 0.72)\cdot 10^4$ | $(4.50\pm 0.09)\cdot 10^4$ |



**Figure S7.** Photos showing the colour change can occur multiple times.

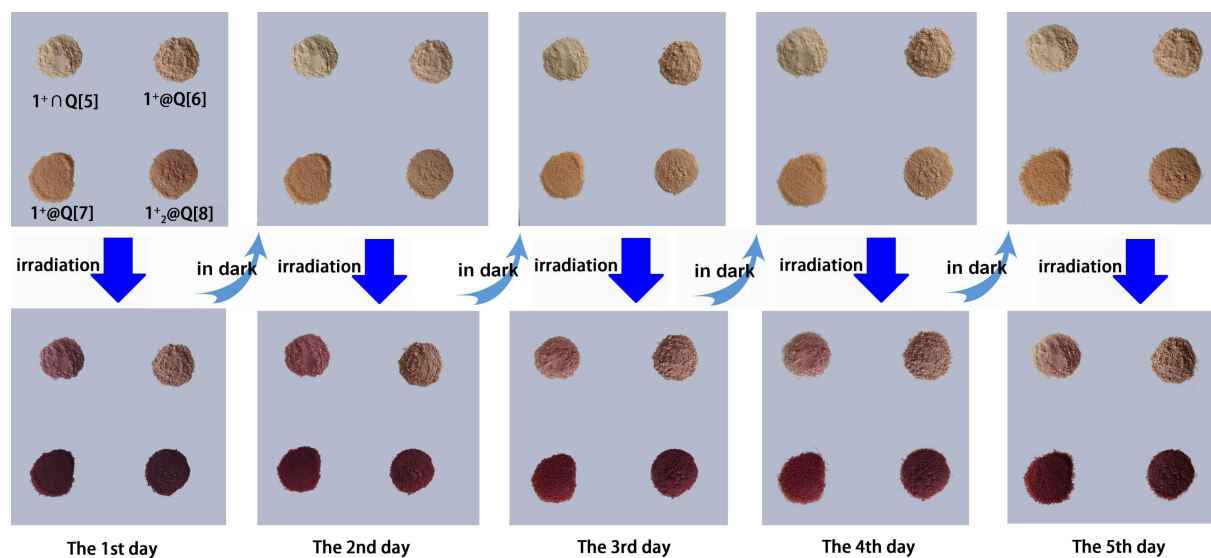

**Figure S8.** IR spectra of  $1^+@Q[7]$  before and after irradiation.

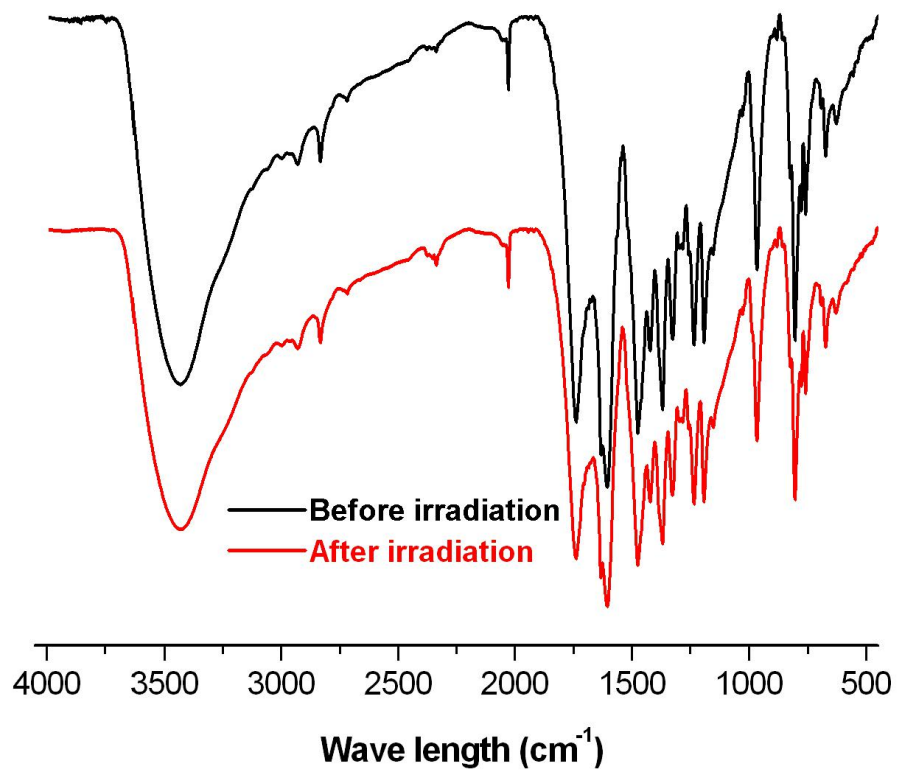

**Figure S9.** IR spectra of inclusion complex  $1^+_2@Q[8]$  before and after irradiation.

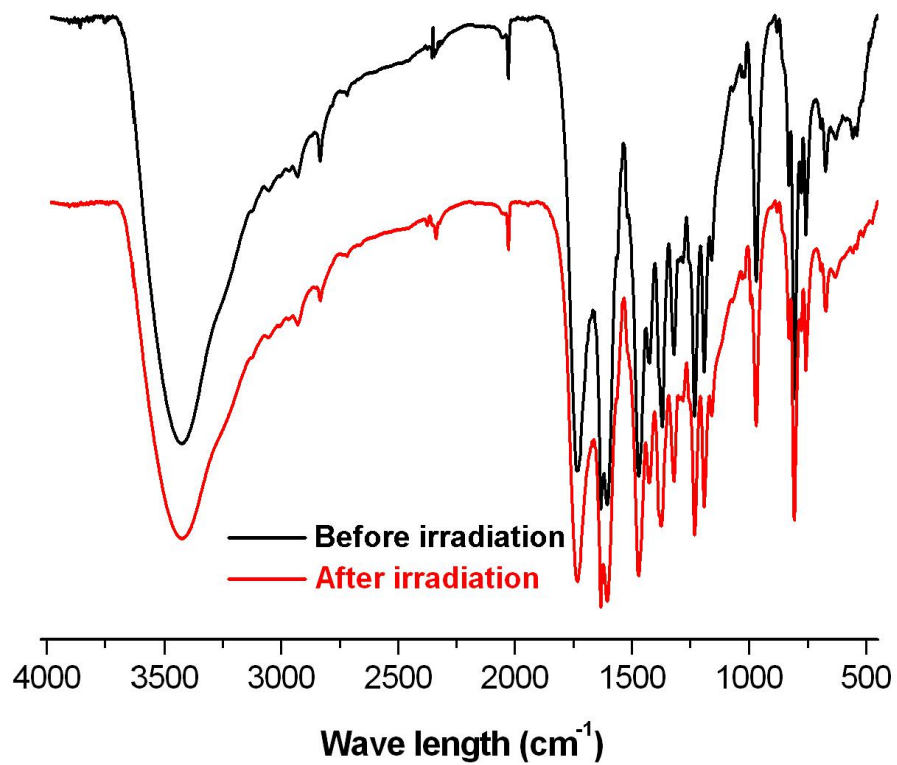

**Figure 10.** Energy minimized structures of four complexes  $1^+ \cap Q[5]$ ,  $1^+ @ Q[6]$ ,  $1^+ @ Q[7]$ , and  $1^+_2 @ Q[8]$  in the gas phase by a HF/3-21G\*\* calculation.

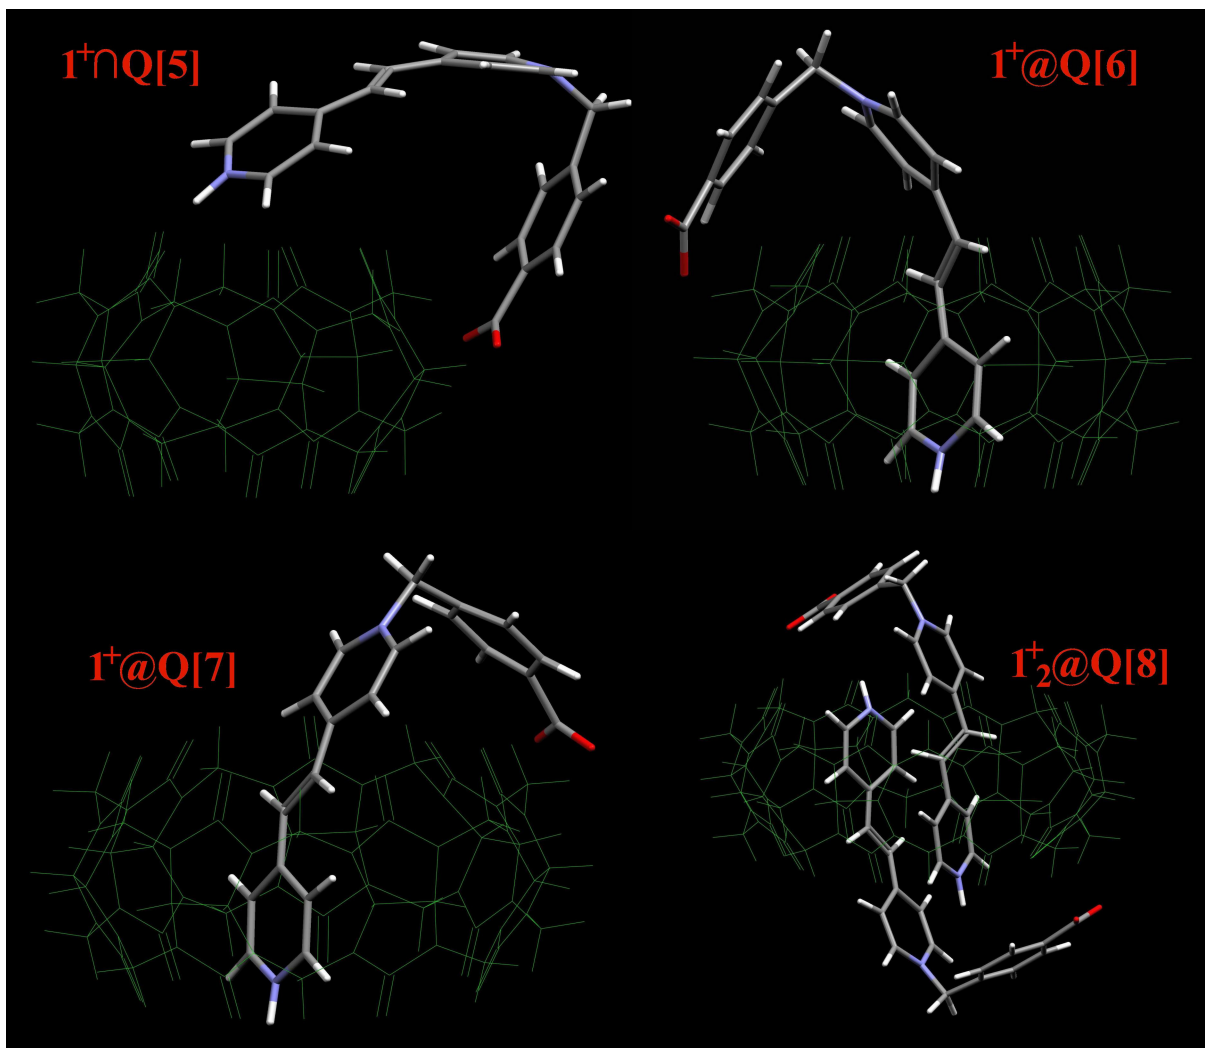

Supplement: d1nj04292k1.pdf [file d1nj04292k1.pdf]
